# Supplementary material for: Comparative Mitogenomic Analysis of Two Cuckoo Bees (Apoidea: Anthophila: Megachilidae) with Phylogenetic Implications
Source: MDPI journal article supplement (doi:10.3390/insects12010029), 2021-01-05

CREx: comparison

[back to distance matrix](#)

Ancestral type → *Euaspis polynesia*

- family diagram for Ancestral type (e)

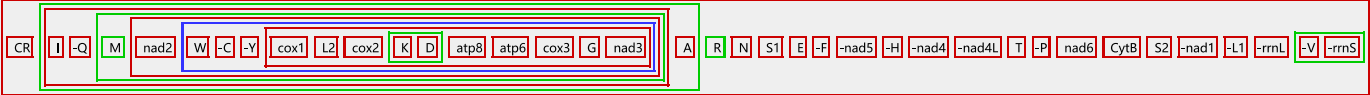

- family diagram for *Euaspis polynesia* (e)

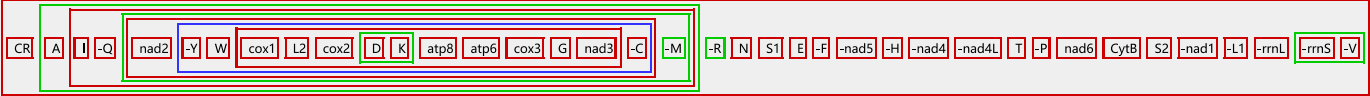

- scenario:

- transposition

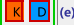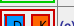

- transposition

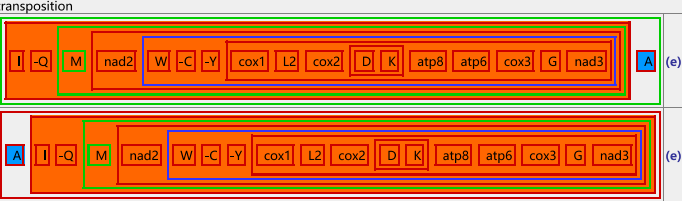

- transposition

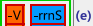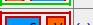

- reverse transposition

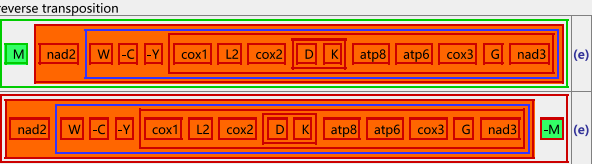

- reversal

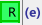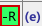

- transposition

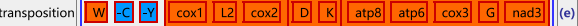

- 

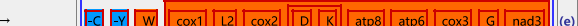

- transposition

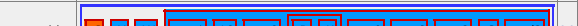

- 

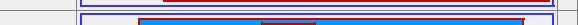

Ancestral type → *Coelioxys fenestrata*

- family diagram for Ancestral type (e)

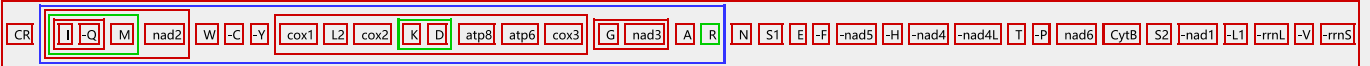

- family diagram for *Coelioxys fenestrata* (e)

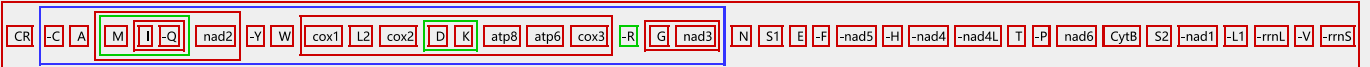

- scenario:

- transposition

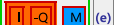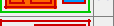

- transposition

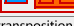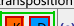

- reversal

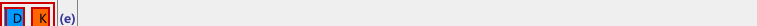

- 

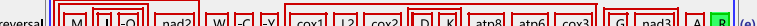

- tdrl

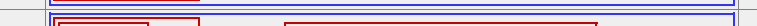

- 

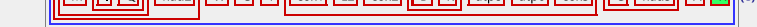

- tdrl

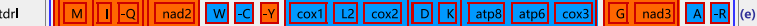

- 

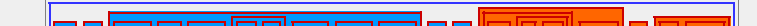

Supplement: s1 [file s1]
