# Supplementary material for: Comparative Mitogenomic Analysis of Two Cuckoo Bees (Apoidea: Anthophila: Megachilidae) with Phylogenetic Implications
Source: MDPI journal article supplement (doi:10.3390/insects12010029), 2021-01-05
Supplement: s1 [file s1]

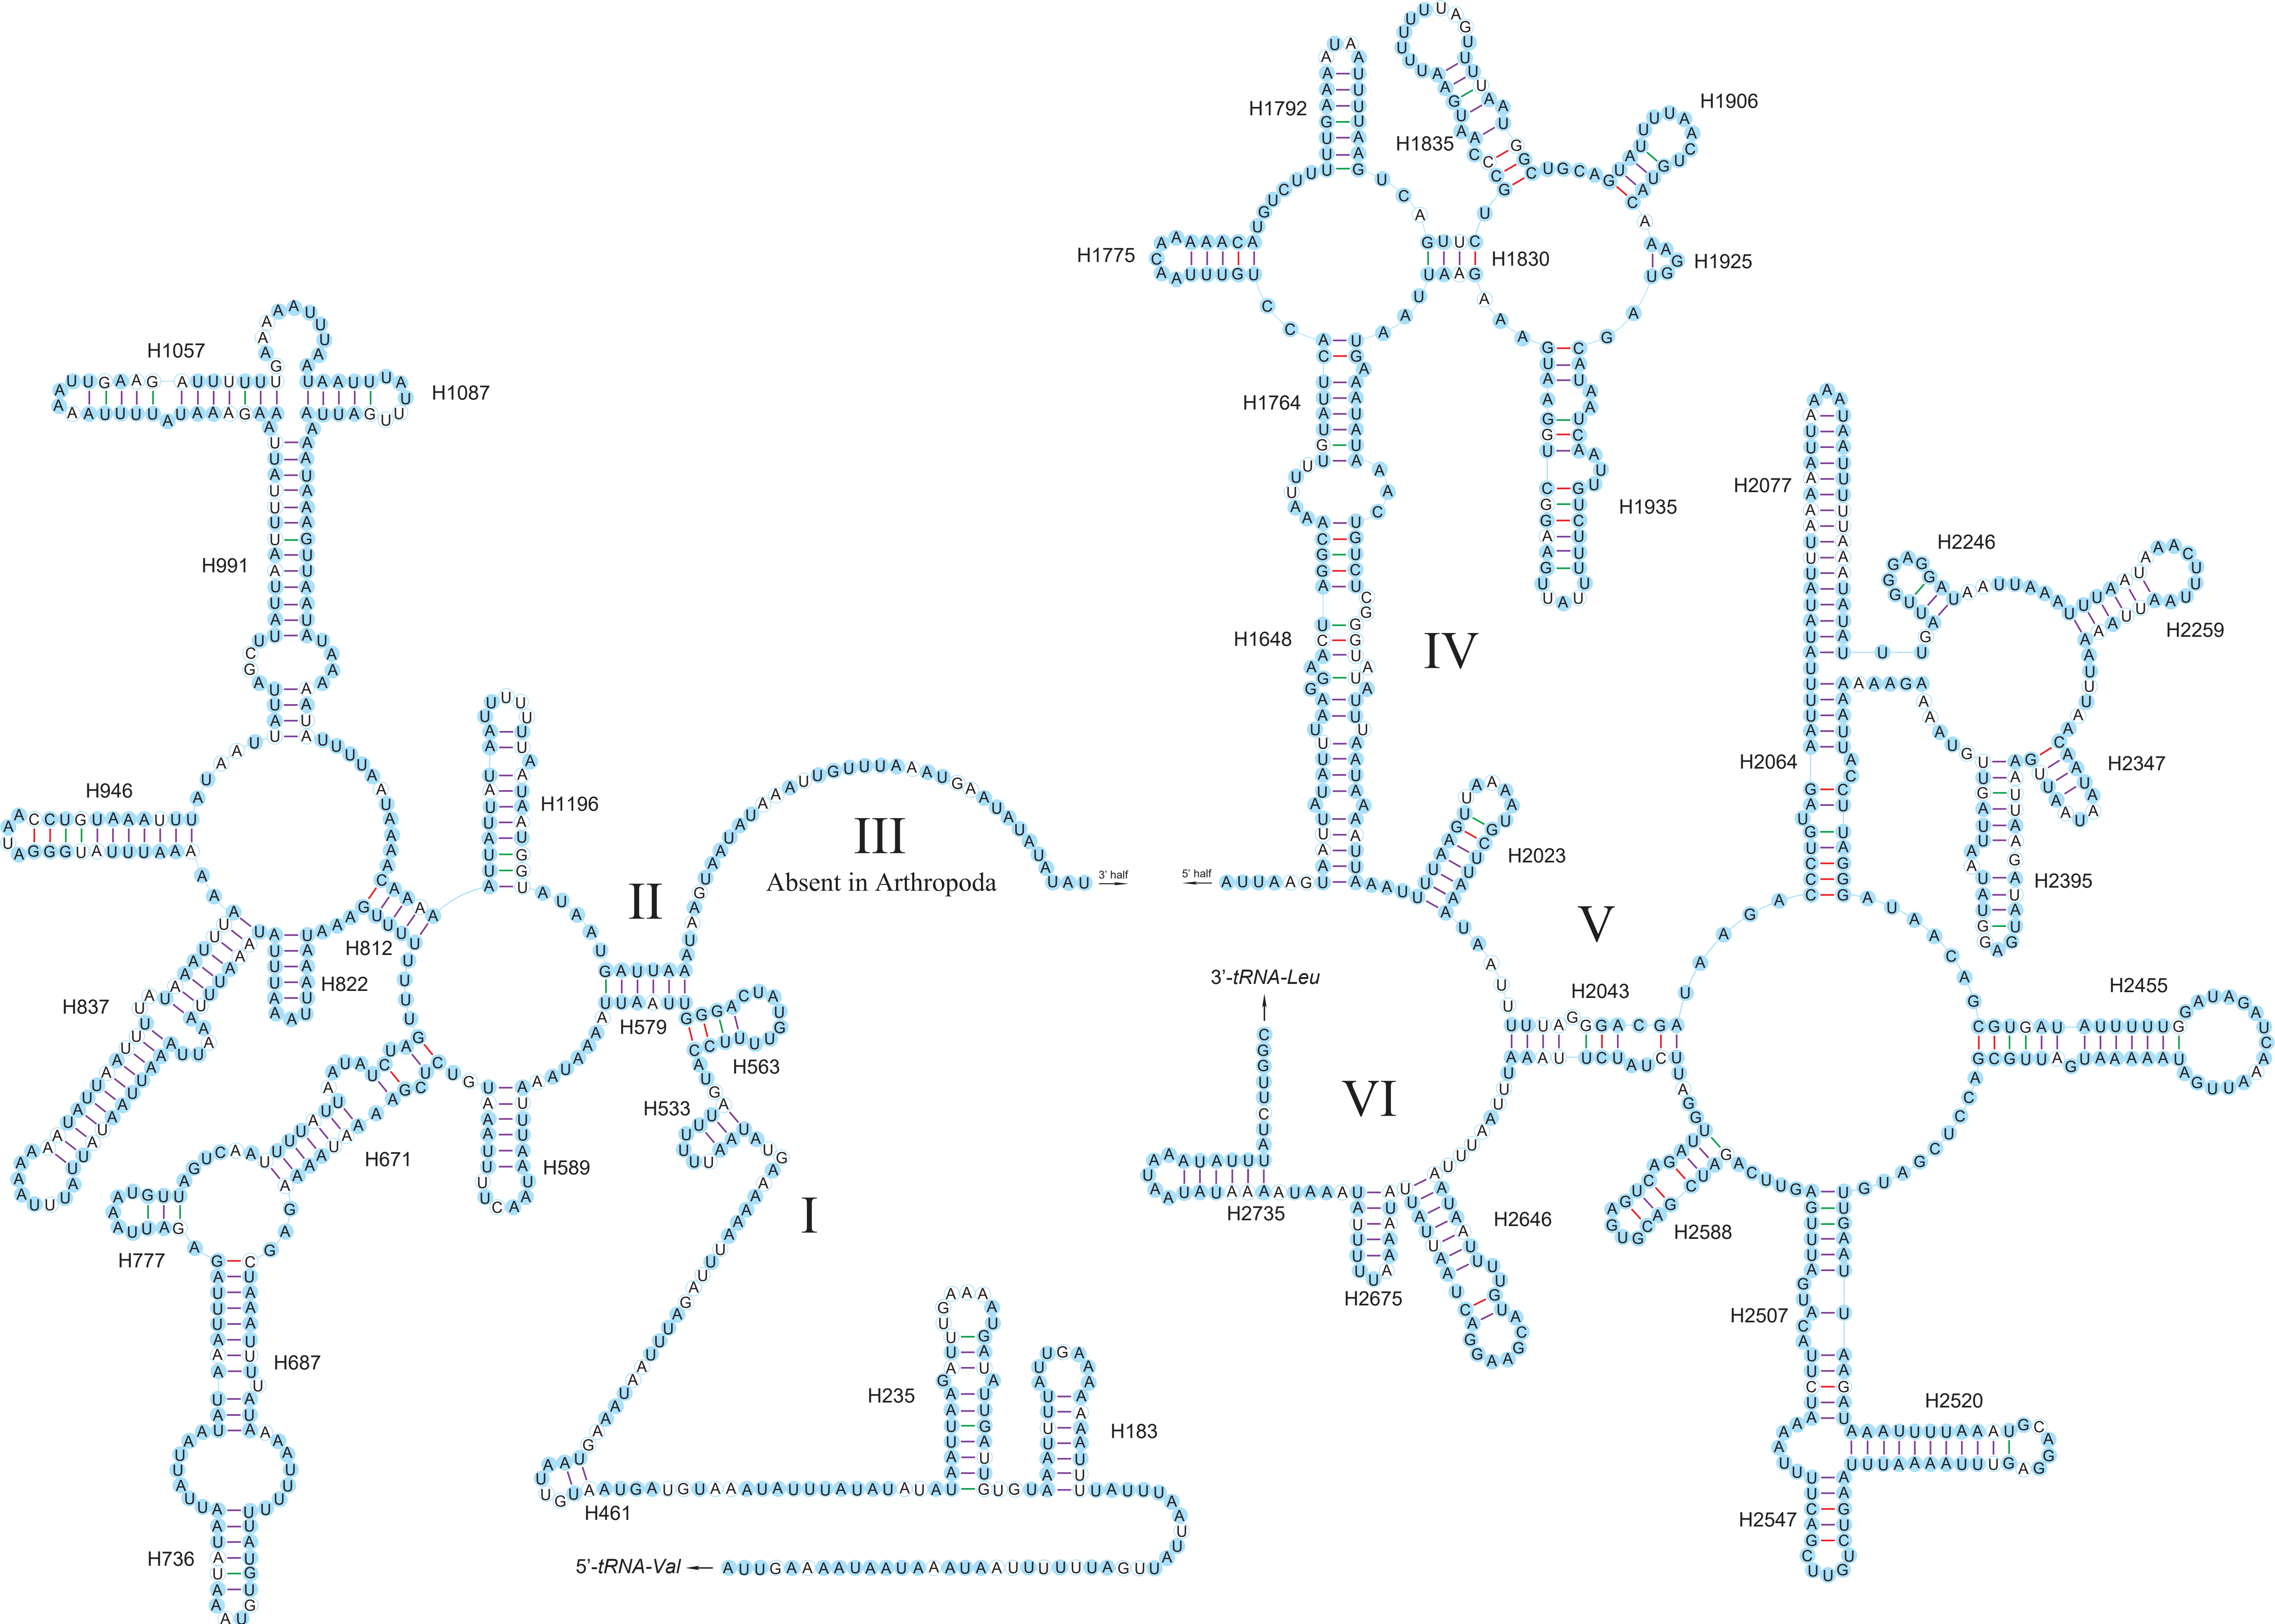

**Note** Predicted secondary structure of the *rrnL* in the mitogenome of *C. fenestrata*. Filled circle, nucleotide conserved in in *E. polynesia* mitogenomes.; hollowed circle, nucleotide not conserved. A-U bonds, G-U bonds, G-C bonds and mismatches are represented by the purple line, the green line, the red line and the solid dots, respectively.
