# Supplementary figures and images for: Comparative Mitogenomic Analysis of Two Cuckoo Bees (Apoidea: Anthophila: Megachilidae) with Phylogenetic Implications
Source: MDPI journal article supplement (doi:10.3390/insects12010029), 2021-01-05

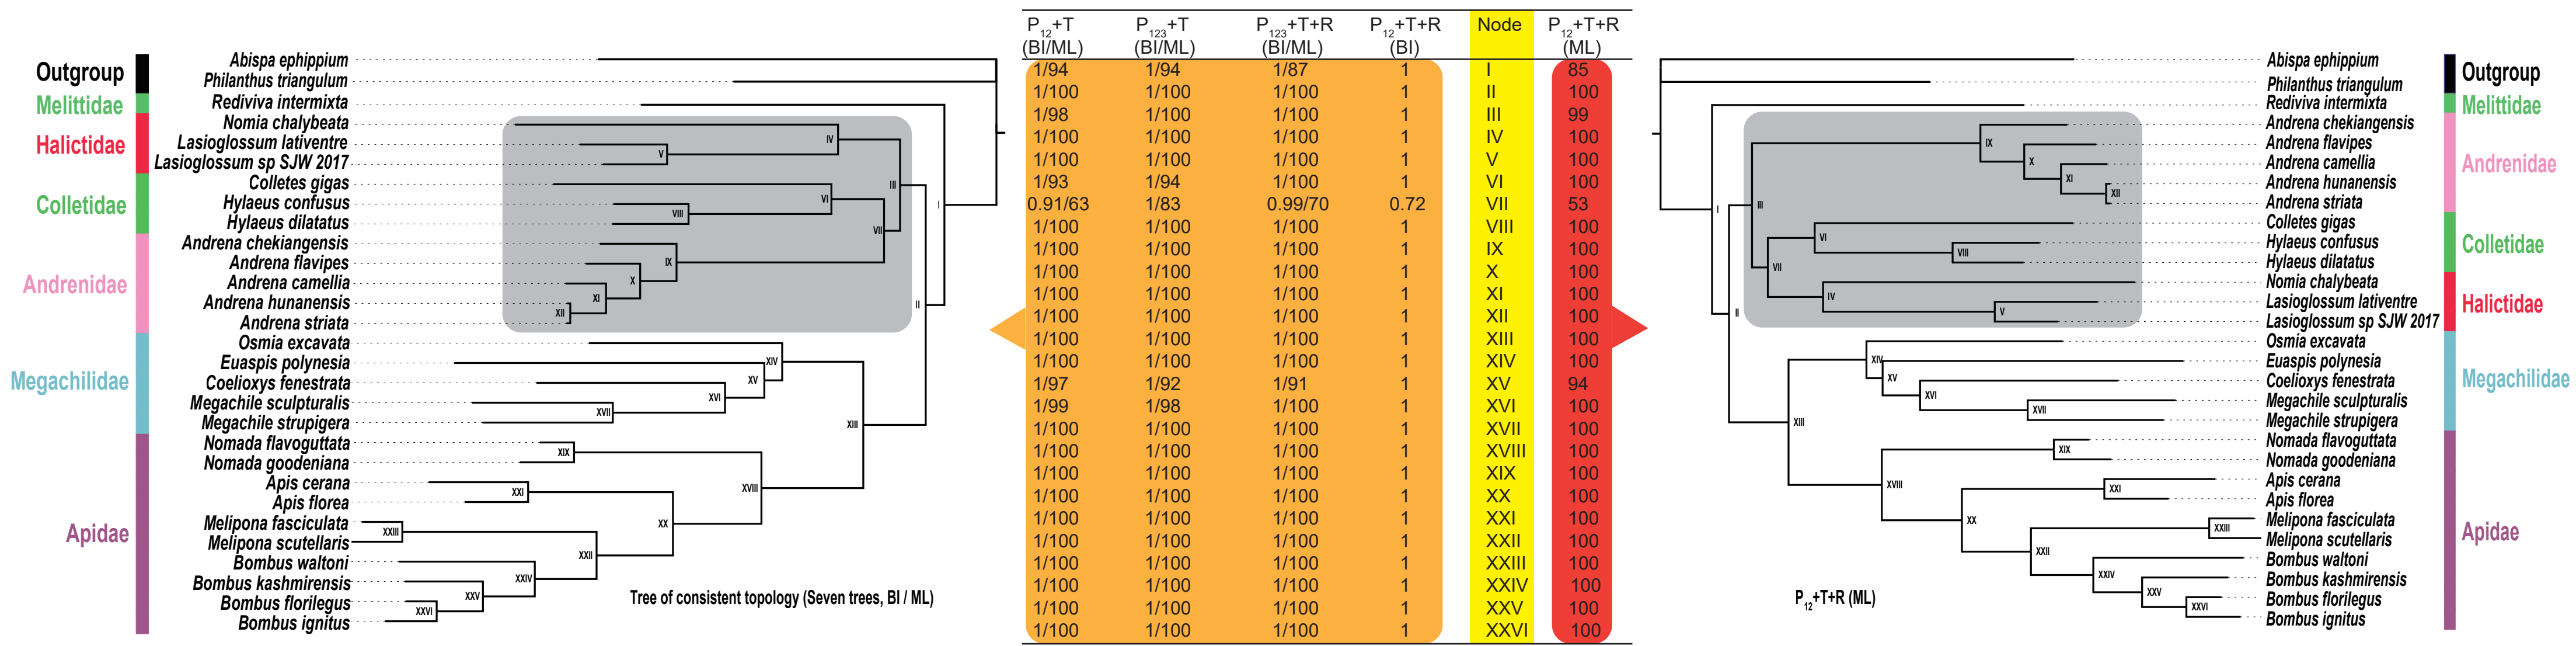

Supplement: s1 [file s1]

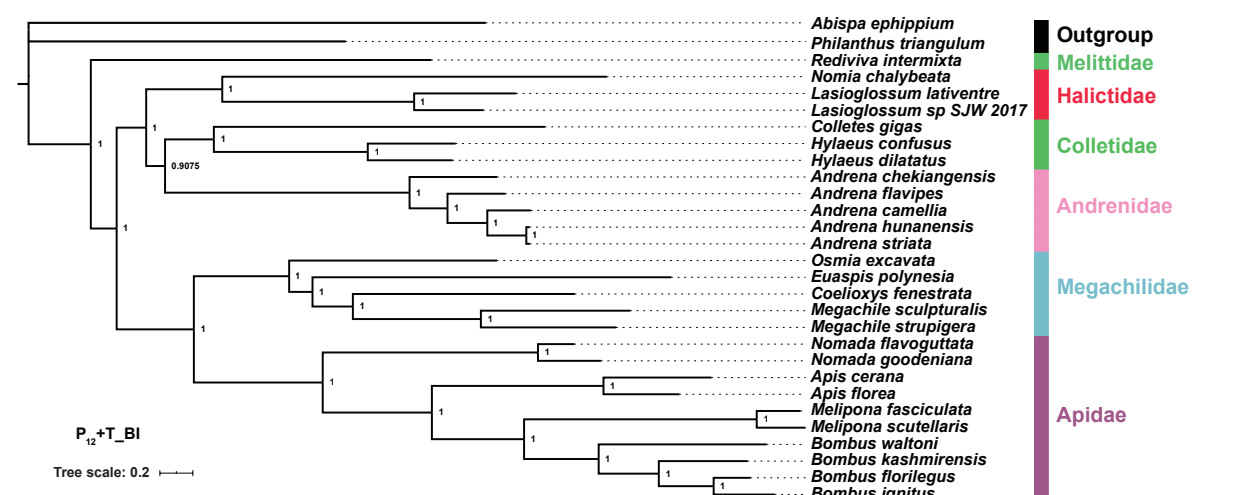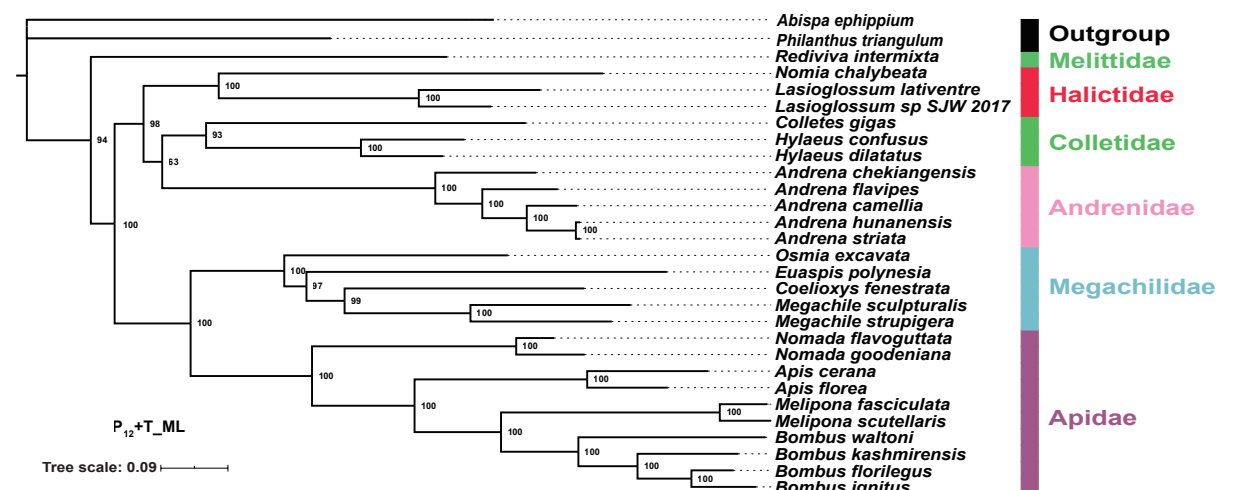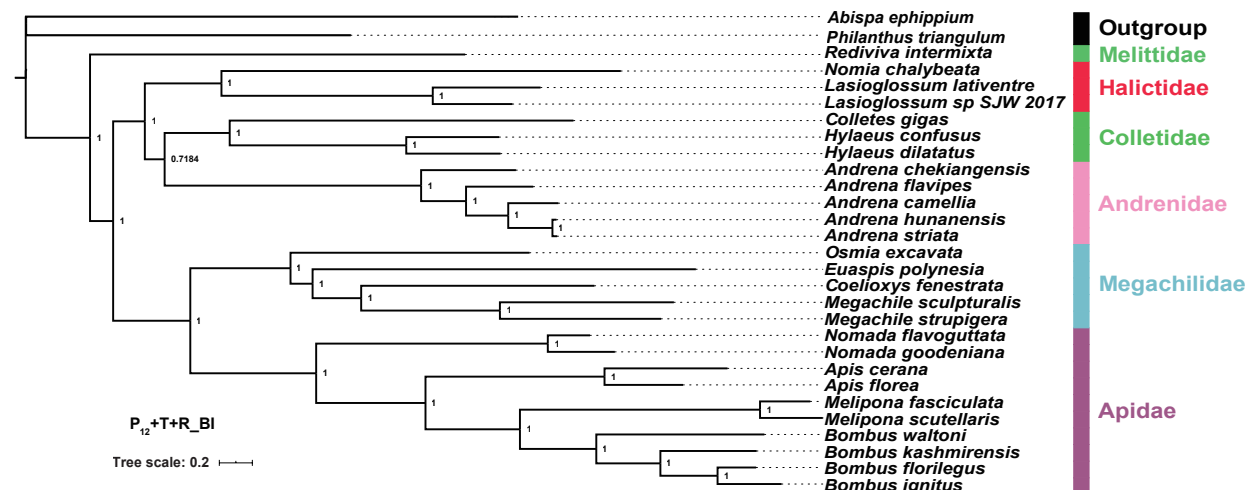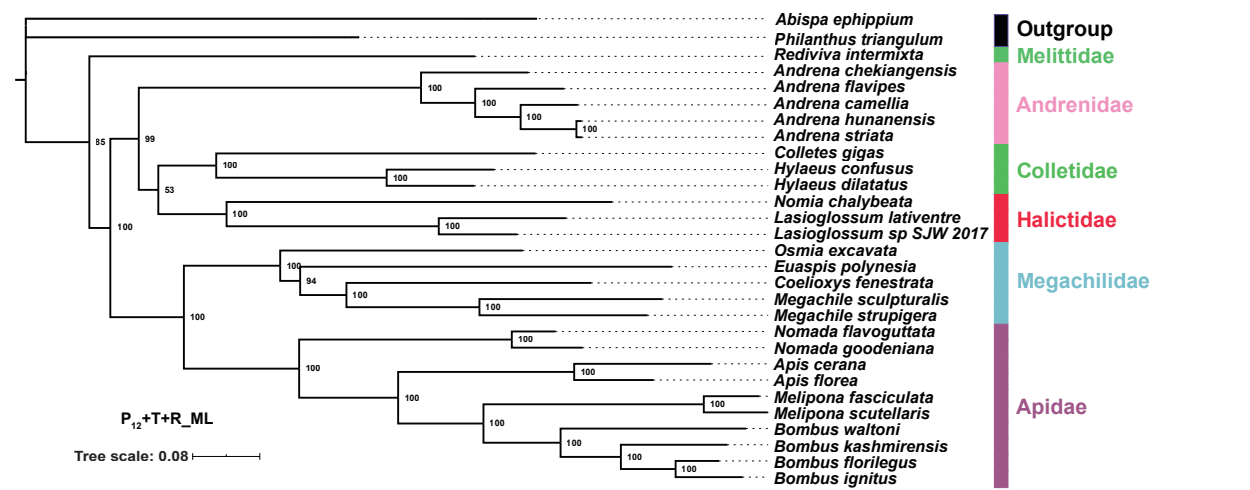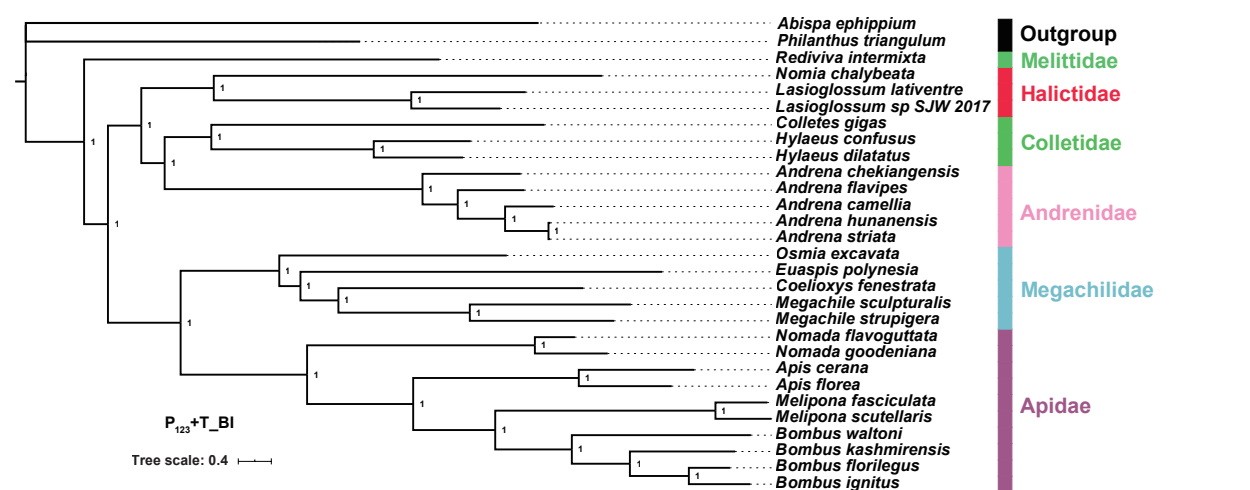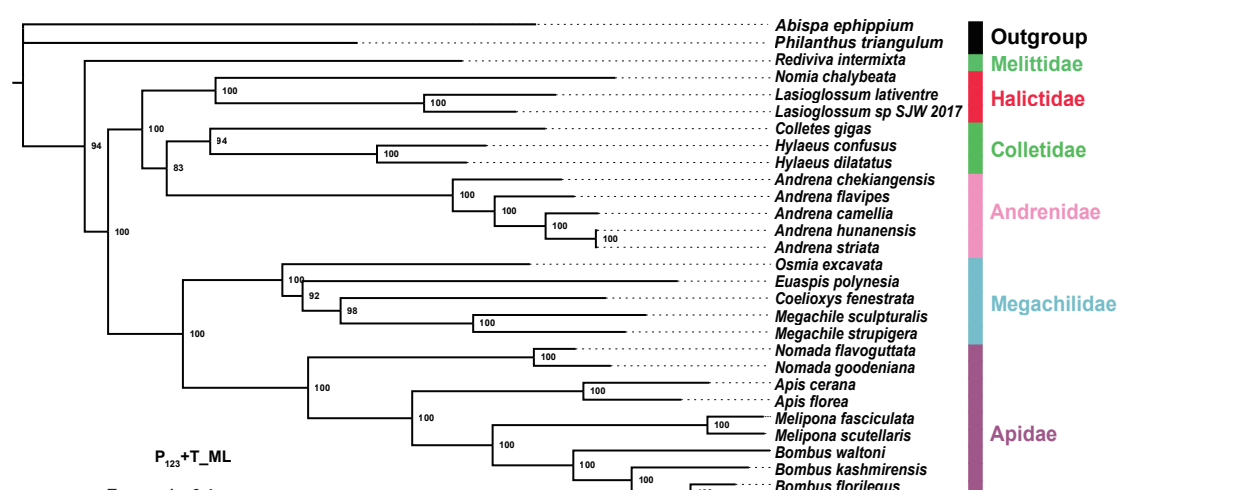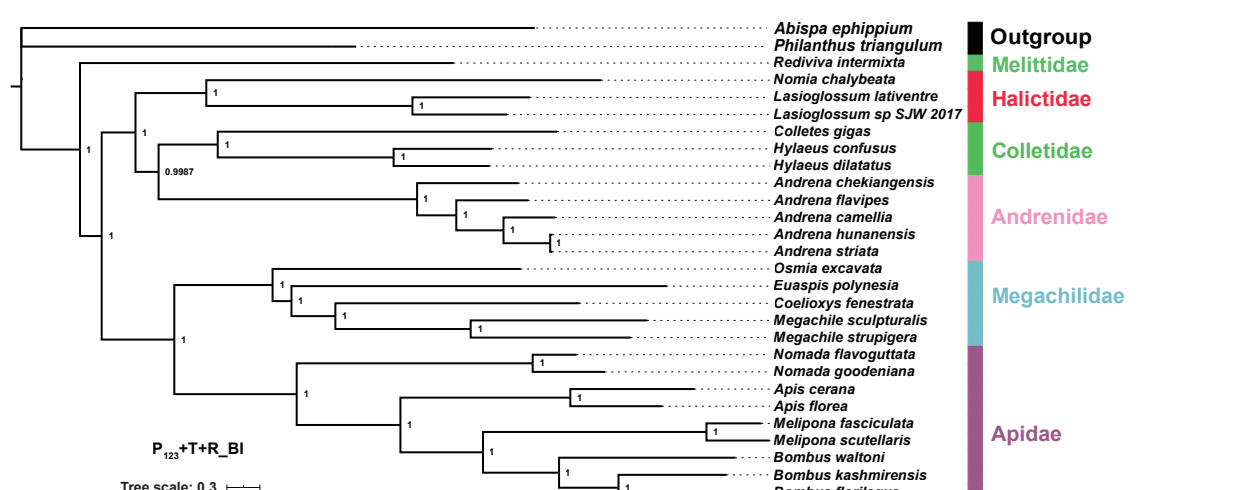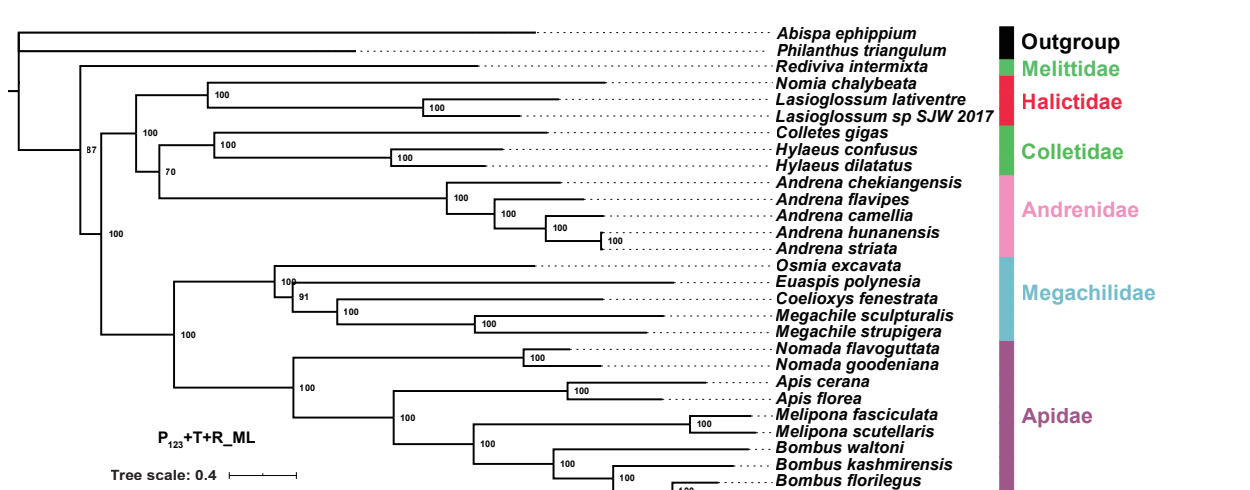

Supplement: s1 [file s1]
